# Supplementary material
Source: publisher figshare collection journal article supplement (https://gsapubs.figshare.com/ndownloader/files/23316587)
Supplement: Supplementary file 1 [file 23316587]

## Sheet: Sheet1
TABLE DR3. U-Pb ISOTOPIC RATIOS AND AGES OF DETRITAL ZIRCONS FROM THE PALEOGENE MINGSHAN FORMATION (CXN134) IN THE SOUTHWESTERN SICHUAN BASIN
Grain No.	Th232	U238	Th/U	Isotope ratios								Ages (Ma)
				Pb207/Pb206	±1σ	Pb207/U235	±1σ	Pb206/U238	±1σ	Pb208/Th232	±1σ	Pb207/Pb206	±1σ	Pb207/U235	±1σ	Pb206/U238	±1σ	Pb208/Th232	±1σ	Best age	±1σ	Con%
CXN134-01	124.37	201.11	0.6184	0.07021	0.00174	1.45517	0.02428	0.15033	0.00149	0.04382	0.00054	935	19	912	10	903	8	867	10	903	8	100.997
CXN134-02	77.6	98.94	0.7843	0.05216	0.00233	0.31416	0.01259	0.04368	0.00054	0.01371	0.00026	292	69	277	10	276	3	275	5	276	3	100.362
CXN134-03	82.86	83.67	0.9903	0.09796	0.00243	3.72236	0.06316	0.27559	0.00297	0.07937	0.001	1586	17	1576	14	1569	15	1544	19	1586	17	101.083
CXN134-04	114.52	183.99	0.6224	0.06637	0.00185	1.11394	0.02329	0.12172	0.00129	0.03734	0.00052	818	26	760	11	740	7	741	10	740	7	102.703
CXN134-05	70.72	360.07	0.1964	0.14164	0.003	7.41065	0.08046	0.37945	0.00357	0.10515	0.00122	2247	8	2162	10	2074	17	2021	22	2247	8	108.341
CXN134-06	60.98	80.31	0.7593	0.07683	0.00219	1.86308	0.04062	0.17588	0.00198	0.05347	0.00081	1117	26	1068	14	1044	11	1053	16	1117	26	106.992
CXN134-07	254.72	369.81	0.6888	0.06713	0.00153	1.26229	0.0171	0.13637	0.00128	0.04486	0.00044	842	14	829	8	824	7	887	9	824	7	100.607
CXN134-08	48.76	203.05	0.2401	0.07425	0.00184	1.69999	0.02829	0.16605	0.00167	0.04835	0.00083	1048	18	1009	11	990	9	954	16	1048	18	105.859
CXN134-09	382.37	1494.81	0.2558	0.05511	0.00141	0.26397	0.00468	0.03474	0.00033	0.013	0.0002	417	23	238	4	220	2	261	4	220	2	108.182
CXN134-10	29.08	92.37	0.3148	0.12431	0.00309	6.22536	0.1078	0.36322	0.00423	0.1079	0.00233	2019	15	2008	15	1997	20	2071	43	2019	15	101.102
CXN134-11	404.43	417.29	0.9692	0.06705	0.00149	1.14623	0.01449	0.12399	0.00114	0.03641	0.00034	839	13	775	7	753	7	723	7	753	7	102.922
CXN134-12	324.68	385.59	0.842	0.16542	0.00341	10.706	0.1037	0.4694	0.00425	0.13352	0.00116	2512	7	2498	9	2481	19	2533	21	2512	7	101.249
CXN134-13	540.81	729.67	0.7412	0.05911	0.00149	0.4535	0.00779	0.05564	0.00053	0.01856	0.00021	571	21	380	5	349	3	372	4	349	3	108.883
CXN134-14	123.75	208.5	0.5935	0.06724	0.00175	1.27606	0.02337	0.13764	0.00139	0.04415	0.00057	845	22	835	10	831	8	873	11	831	8	100.481
CXN134-15	37.45	105.12	0.3563	0.08813	0.00205	2.83195	0.0408	0.23306	0.0023	0.07098	0.00097	1385	14	1364	11	1351	12	1386	18	1385	14	102.517
CXN134-16	197.72	172.39	1.1469	0.06492	0.00177	1.08002	0.02161	0.12066	0.00125	0.03558	0.00042	772	25	744	11	734	7	707	8	734	7	101.362
CXN134-17	134.96	136.48	0.9889	0.05475	0.00276	0.33073	0.01524	0.04381	0.00061	0.01368	0.00028	402	78	290	12	276	4	275	6	276	4	105.072
CXN134-18	46.94	215.86	0.2175	0.051	0.00155	0.38436	0.00917	0.05466	0.00056	0.01745	0.00037	241	36	330	7	343	3	350	7	343	3	96.2099
CXN134-19	155.15	146.29	1.0606	0.06598	0.00184	1.19629	0.02505	0.13149	0.00139	0.04021	0.00048	806	26	799	12	796	8	797	9	796	8	100.377
CXN134-20	81.91	275.46	0.2974	0.12156	0.0027	5.89623	0.0754	0.35177	0.00349	0.09234	0.00126	1979	11	1961	11	1943	17	1785	23	1979	11	101.853
CXN134-21	195.75	136.53	1.4338	0.06493	0.00175	1.09127	0.02146	0.12189	0.00125	0.0356	0.00038	772	24	749	10	741	7	707	7	741	7	101.08
CXN134-22	225.67	493.61	0.4572	0.07023	0.00152	1.49492	0.01713	0.15438	0.0014	0.04734	0.00046	935	11	928	7	925	8	935	9	925	8	100.324
CXN134-23	142.32	177.92	0.7999	0.05367	0.00188	0.32727	0.00964	0.04423	0.00049	0.01318	0.0002	357	46	287	7	279	3	265	4	279	3	102.867
CXN134-24	119.21	201.45	0.5918	0.07448	0.00205	1.5425	0.0315	0.15021	0.00162	0.04493	0.0007	1055	24	948	13	902	9	888	14	1055	24	105.1
CXN134-25	217.38	397.78	0.5465	0.16386	0.00345	10.5849	0.11293	0.4685	0.00443	0.14132	0.00146	2496	8	2487	10	2477	19	2672	26	2496	8	100.767
CXN134-26	40.62	54.1	0.7508	0.06825	0.00251	1.17784	0.03712	0.12517	0.0016	0.03767	0.00072	876	44	790	17	760	9	747	14	760	9	103.947
CXN134-27	97.02	399.93	0.2426	0.0585	0.00136	0.73703	0.01054	0.09137	0.00085	0.02981	0.00037	549	16	561	6	564	5	594	7	564	5	99.4681
CXN134-28	163.42	228.14	0.7163	0.05817	0.00168	0.56336	0.01239	0.07024	0.00072	0.02176	0.00029	536	30	454	8	438	4	435	6	438	4	103.653
CXN134-29	160.28	246.74	0.6496	0.09191	0.00208	2.98867	0.0399	0.23584	0.00228	0.07018	0.00076	1466	12	1405	10	1365	12	1371	14	1466	12	107.399
CXN134-30	169.47	410.21	0.4131	0.05579	0.00158	0.35742	0.00763	0.04647	0.00047	0.01415	0.00021	444	30	310	6	293	3	284	4	293	3	105.802
CXN134-31	137.48	237.36	0.5792	0.05764	0.00155	0.56064	0.01091	0.07054	0.0007	0.02247	0.00028	516	26	452	7	439	4	449	6	439	4	102.961
CXN134-32	65.48	99.25	0.6597	0.09932	0.0027	3.87209	0.07859	0.28273	0.00337	0.08377	0.0014	1611	21	1608	16	1605	17	1626	26	1611	21	100.374
CXN134-33	94.08	372.12	0.2528	0.06822	0.00127	1.30965	0.02105	0.13924	0.00129	0.04237	0.00037	875	39	850	9	840	7	839	7	840	7	101.19
CXN134-34	106.62	202.49	0.5265	0.05641	0.00166	0.52399	0.01186	0.06737	0.00069	0.02106	0.00031	469	32	428	8	420	4	421	6	420	4	101.905
CXN134-35	358.54	831.31	0.4313	0.05566	0.00125	0.53921	0.00705	0.07026	0.00064	0.02311	0.00023	439	14	438	5	438	4	462	5	438	4	100
CXN134-36	166.73	163.47	1.0199	0.05284	0.0019	0.34336	0.01047	0.04712	0.00052	0.01391	0.0002	322	49	300	8	297	3	279	4	297	3	101.01
CXN134-37	68.55	99.84	0.6866	0.05281	0.00271	0.37291	0.0186	0.05122	0.00062	0.01606	0.00014	320	120	322	14	322	4	322	3	322	4	100
CXN134-38	190.33	242.06	0.7863	0.05785	0.00169	0.53618	0.01201	0.06721	0.00069	0.02128	0.00027	524	31	436	8	419	4	426	5	419	4	104.057
CXN134-39	74.27	195.7	0.3795	0.05332	0.00167	0.40922	0.01023	0.05566	0.00058	0.01719	0.0003	342	38	348	7	349	4	344	6	349	4	99.7135
CXN134-40	75.46	174.46	0.4325	0.10202	0.00234	4.07698	0.05693	0.28982	0.0029	0.08407	0.00114	1661	13	1650	11	1641	14	1632	21	1661	13	101.219
CXN134-41	130.98	213.02	0.6149	0.05506	0.00185	0.34268	0.00946	0.04514	0.00049	0.01442	0.00023	415	42	299	7	285	3	289	5	285	3	104.912
CXN134-42	73.67	202.62	0.3636	0.11455	0.00244	5.30046	0.05892	0.33559	0.00313	0.09597	0.00107	1873	9	1869	9	1865	15	1852	20	1873	9	100.429
CXN134-43	179.38	405.61	0.4422	0.11409	0.00239	5.17881	0.05321	0.32921	0.00299	0.0909	0.00087	1866	8	1849	9	1835	15	1759	16	1866	8	101.689
CXN134-44	97.55	215.37	0.4529	0.06492	0.00156	1.13737	0.01754	0.12707	0.00121	0.03881	0.00047	772	17	771	8	771	7	770	9	771	7	100
CXN134-45	169.18	258.2	0.6552	0.0563	0.00152	0.54583	0.0107	0.07031	0.00069	0.02185	0.00027	464	26	442	7	438	4	437	5	438	4	100.913
CXN134-46	162.92	206.36	0.7895	0.10525	0.00229	4.31899	0.05145	0.29761	0.00282	0.08296	0.00083	1719	10	1697	10	1679	14	1611	15	1719	10	102.382
CXN134-47	354.58	547.24	0.6479	0.05324	0.00134	0.35266	0.00606	0.04804	0.00045	0.01501	0.00017	339	22	307	5	302	3	301	3	302	3	101.656
CXN134-48	99.44	319.94	0.3108	0.11437	0.0024	5.26917	0.05459	0.33413	0.00304	0.0903	0.00094	1870	8	1864	9	1858	15	1747	17	1870	8	100.646
CXN134-49	90.87	506.09	0.1796	0.07487	0.00168	1.85222	0.02394	0.17942	0.00168	0.06098	0.0008	1065	12	1064	9	1064	9	1196	15	1065	12	100.094
CXN134-50	107.22	150.9	0.7105	0.05132	0.00201	0.27733	0.00945	0.03919	0.00045	0.01231	0.00021	255	57	249	8	248	3	247	4	248	3	100.403
CXN134-51	81.33	234.62	0.3466	0.16125	0.00259	10.0374	0.12794	0.45147	0.00439	0.12569	0.00121	2469	28	2438	12	2402	19	2393	22	2469	28	102.789
CXN134-52	134.83	108.27	1.2453	0.06556	0.00187	1.18612	0.02563	0.13121	0.00139	0.03989	0.00046	792	28	794	12	795	8	791	9	795	8	99.8742
CXN134-53	363.08	428.56	0.8472	0.06441	0.00211	1.05189	0.03267	0.11844	0.00123	0.03628	0.00031	755	71	730	16	722	7	720	6	722	7	101.108
CXN134-54	70.25	93.38	0.7523	0.11885	0.00283	5.6649	0.08803	0.34568	0.00374	0.10069	0.00127	1939	14	1926	13	1914	18	1939	23	1939	14	101.306
CXN134-55	113.01	114.78	0.9846	0.06791	0.00199	1.28727	0.02932	0.13747	0.00151	0.04282	0.00057	866	29	840	13	830	9	847	11	830	9	101.205
CXN134-56	228.11	411.78	0.554	0.05392	0.00145	0.34003	0.0066	0.04573	0.00044	0.01495	0.00018	368	27	297	5	288	3	300	4	288	3	103.125
CXN134-57	85.96	84.64	1.0156	0.06398	0.00212	1.01572	0.02769	0.11514	0.00133	0.0355	0.0005	741	38	712	14	703	8	705	10	703	8	101.28
CXN134-58	166.7	756.42	0.9846	0.16599	0.00346	10.8044	0.11076	0.47207	0.00438	0.15731	0.0019	2518	8	2506	10	2493	19	2953	33	2518	8	101.003
CXN134-59	304.47	889.36	0.3423	0.11158	0.00231	4.64625	0.04498	0.302	0.00269	0.08827	0.0008	1825	8	1758	8	1701	13	1710	15	1825	8	107.29
CXN134-60	232.61	348.79	0.6669	0.06906	0.00157	1.31872	0.01769	0.13848	0.00129	0.04107	0.00042	901	14	854	8	836	7	814	8	836	7	102.153
CXN134-61	188.27	419.13	0.4492	0.05676	0.00138	0.52066	0.00819	0.06653	0.00062	0.02037	0.00024	482	19	426	5	415	4	408	5	415	4	102.651
CXN134-62	214.33	206.96	1.0356	0.06313	0.00168	1.02022	0.01948	0.11719	0.00118	0.03618	0.00039	713	24	714	10	714	7	718	8	714	7	100
CXN134-63	9.73	870.43	0.0112	0.11038	0.00143	4.70927	0.04529	0.30943	0.00271	0.08945	0.00081	1806	24	1769	8	1738	13	1732	15	1806	24	103.913
CXN134-64	169.47	267.84	0.6327	0.05752	0.00259	0.34306	0.01382	0.04326	0.00057	0.01396	0.00032	512	65	299	10	273	4	280	6	273	4	109.524
CXN134-65	28.65	63.77	0.4493	0.11623	0.00286	5.40392	0.09057	0.33718	0.00377	0.1	0.00165	1899	15	1885	14	1873	18	1926	30	1899	15	101.388
CXN134-66	48.89	194.26	0.2517	0.07398	0.00181	1.79558	0.02916	0.17602	0.00175	0.05078	0.00085	1041	18	1044	11	1045	10	1001	16	1041	18	99.6172
CXN134-67	1509.99	634.32	2.3805	0.11172	0.00245	4.9674	0.06073	0.32246	0.0031	0.08594	0.00076	1828	10	1814	10	1802	15	1666	14	1828	10	101.443
CXN134-68	177.28	257.86	0.6875	0.05414	0.00179	0.36303	0.00987	0.04863	0.00053	0.01491	0.00023	377	41	314	7	306	3	299	5	306	3	102.614
CXN134-69	188.85	235.55	0.8017	0.16618	0.00344	10.8527	0.1076	0.47363	0.00432	0.13451	0.00121	2520	7	2511	9	2499	19	2551	22	2520	7	100.84
CXN134-70	261.17	596.26	0.438	0.05513	0.0013	0.50747	0.00747	0.06675	0.00062	0.02166	0.00024	417	17	417	5	417	4	433	5	417	4	100
CXN134-71	108.8	141.34	0.7698	0.05806	0.00177	0.57349	0.01379	0.07164	0.00075	0.02284	0.00031	532	34	460	9	446	5	456	6	446	5	103.139
CXN134-72	122.79	191.57	0.641	0.05903	0.00163	0.58536	0.012	0.07191	0.00072	0.02268	0.00029	568	27	468	8	448	4	453	6	448	4	104.464
CXN134-73	364.53	537.08	0.6787	0.05163	0.00155	0.29924	0.00704	0.04204	0.00043	0.01354	0.00018	269	35	266	6	265	3	272	4	265	3	100.377
CXN134-74	188.14	223.63	0.8413	0.10067	0.00224	3.95106	0.05067	0.28462	0.00274	0.08189	0.00085	1636	11	1624	10	1615	14	1591	16	1636	11	101.3
CXN134-75	141.82	212.24	0.6682	0.1663	0.00348	10.8815	0.11315	0.47452	0.00442	0.13016	0.00126	2521	8	2513	10	2503	19	2473	23	2521	8	100.719
CXN134-76	174.53	176.41	0.9893	0.0513	0.0018	0.2815	0.00831	0.0398	0.00043	0.01284	0.00017	254	48	252	7	252	3	258	3	252	3	100
CXN134-77	127.83	179.71	0.7113	0.06471	0.00159	1.1306	0.01852	0.1267	0.00122	0.03976	0.00045	765	19	768	9	769	7	788	9	769	7	99.87
CXN134-78	98.84	128.56	0.7688	0.05155	0.00249	0.26198	0.01153	0.03685	0.00049	0.01195	0.00024	266	77	236	9	233	3	240	5	233	3	101.288
CXN134-79	63.57	190.83	0.3331	0.11503	0.00247	5.35512	0.06064	0.33762	0.00316	0.09605	0.00113	1880	9	1878	10	1875	15	1854	21	1880	9	100.267
CXN134-80	42.72	101	0.423	0.1666	0.00376	10.7753	0.14934	0.46905	0.00511	0.13389	0.00221	2524	11	2504	13	2479	22	2540	39	2524	11	101.815
CXN134-81	116.89	184.07	0.635	0.11113	0.00248	4.94935	0.06415	0.323	0.00317	0.0925	0.00105	1818	11	1811	11	1804	15	1788	19	1818	11	100.776
CXN134-82	319.31	290.28	1.1	0.05607	0.00191	0.36915	0.01044	0.04775	0.00053	0.01571	0.00021	455	43	319	8	301	3	315	4	301	3	105.98
CXN134-83	54.31	397.18	0.1367	0.11641	0.00171	5.26173	0.06048	0.32783	0.00299	0.09426	0.00087	1902	27	1863	10	1828	15	1821	16	1902	27	104.048
CXN134-84	311.54	715.91	0.4352	0.06702	0.00149	1.29026	0.01629	0.13963	0.00128	0.04787	0.0005	838	13	841	7	843	7	945	10	843	7	99.7628
CXN134-85	225.66	346.87	0.6506	0.05153	0.00149	0.28395	0.00626	0.03996	0.0004	0.01209	0.00016	265	32	254	5	253	2	243	3	253	2	100.395
CXN134-86	75.07	205.99	0.3644	0.11249	0.0024	5.11563	0.05675	0.32979	0.00306	0.09932	0.00109	1840	9	1839	9	1837	15	1914	20	1840	9	100.163
CXN134-87	55.32	300.78	0.1839	0.08133	0.00188	2.26611	0.03195	0.20206	0.00195	0.05547	0.00092	1229	14	1202	10	1186	10	1091	18	1229	14	103.626
CXN134-88	342.26	353.67	0.6506	0.05399	0.00147	0.3559	0.0071	0.0478	0.00047	0.01491	0.00016	371	27	309	5	301	3	299	3	301	3	102.658
CXN134-89	38.57	106.56	0.362	0.08034	0.00206	2.20062	0.03941	0.19864	0.00207	0.05962	0.00097	1205	19	1181	13	1168	11	1170	19	1205	19	103.168
CXN134-90	187.69	222.85	0.8422	0.09604	0.0023	3.26468	0.05082	0.24652	0.00253	0.07383	0.00087	1549	15	1473	12	1421	13	1440	16	1549	15	109.008
CXN134-91	63.94	199.47	0.3205	0.11596	0.00248	5.45847	0.06115	0.34137	0.00318	0.0997	0.00116	1895	9	1894	10	1893	15	1921	21	1895	9	100.106
CXN134-92	115.22	339.56	0.3393	0.11385	0.00247	5.23035	0.06223	0.33316	0.00317	0.09424	0.00116	1862	10	1858	10	1854	15	1820	21	1862	10	100.431
CXN134-93	120.19	152.87	0.7862	0.11409	0.00253	5.27146	0.06698	0.33508	0.00327	0.09729	0.00104	1866	11	1864	11	1863	16	1877	19	1866	11	100.161
CXN134-94	144.34	165.05	0.8745	0.0807	0.00194	2.21812	0.03461	0.19934	0.00198	0.06057	0.00067	1214	16	1187	11	1172	11	1189	13	1214	16	103.584
CXN134-95	73.09	386.18	0.1893	0.07272	0.00197	1.47134	0.03726	0.14673	0.00142	0.04434	0.00092	1006	56	919	15	883	8	877	18	883	8	104.077
CXN134-96	124.57	407.18	0.3059	0.11307	0.00235	5.16754	0.05149	0.33145	0.00297	0.09845	0.00096	1849	8	1847	8	1845	14	1898	18	1849	8	100.217
